# Supplementary figures and images for: Moderation of the Association between Media Exposure and Youth Smoking Onset: Race/Ethnicity, and Parent Smoking
Source: PubMed Central journal article supplement — Prev Sci. 2011 Sep 8;13(1):55–63. doi: 10.1007/s11121-011-0244-3 (PMC3284682; doi:10.1007/s11121-011-0244-3), 2011-09-08

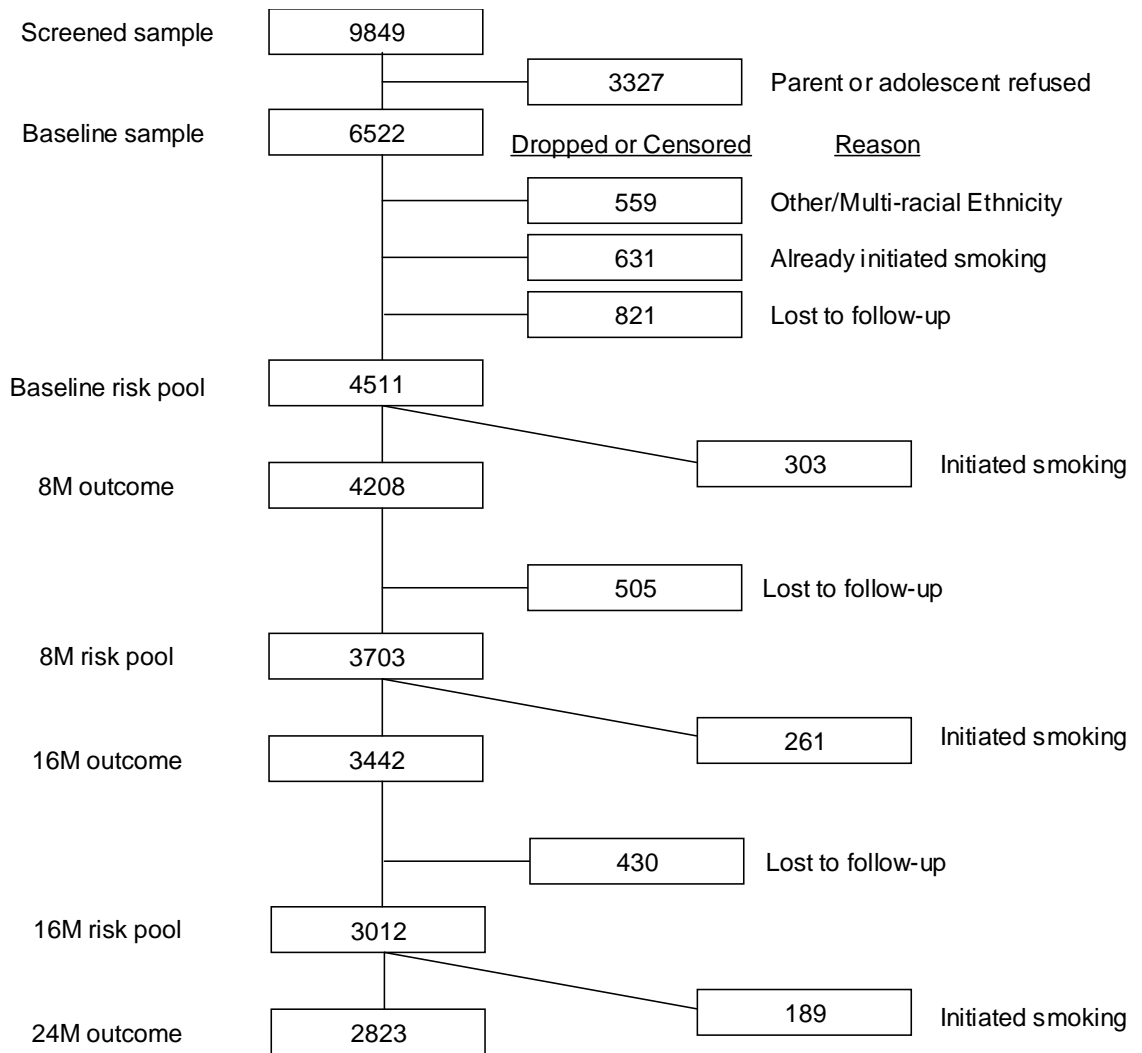

Supplement: 11121_2011_244_MOESM2_ESM.pdf [file 11121_2011_244_MOESM2_ESM.pdf]
